# Supplementary material
Source: publisher figshare collection journal article supplement (https://karger.figshare.com/articles/dataset/_/5128585)
Supplement: Supplementary file 1 [file 1]

## **Supplementary Figure**

Title: Plasma pro endothelin-1 as an early marker of bronchopulmonary dysplasia

Authors: Philipp Baumann, Sotirios Fouzas, Isabelle Pramana, Beate Grass, Oliver Niesse, Christoph Bührer, Katharina Spanaus, Sven Wellmann

*Journal:* Neonatology

## **Supplementary Figure**

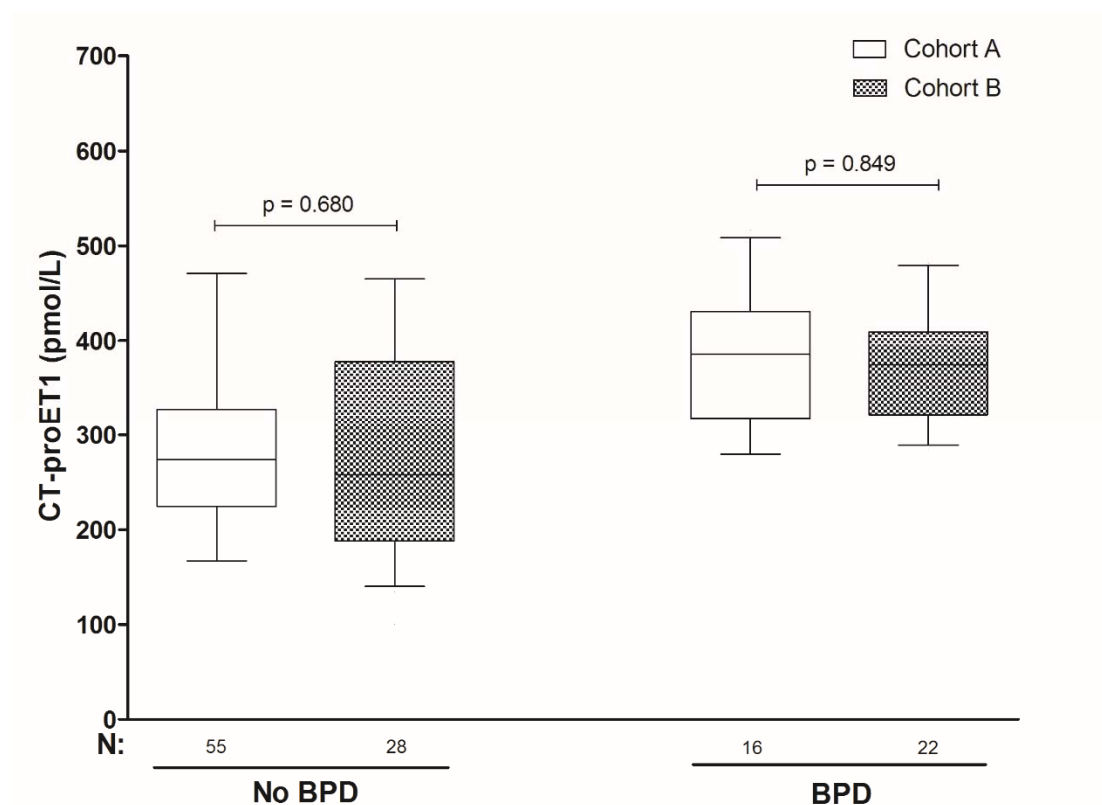

Circulating CT-proET1 levels at DOL 2-3 stratified by study population and presence of BPD. Cohort A refers to 71 neonates included to explore the relationship between respiratory morbidity and plasma CT-proET1 levels at birth and DOL 3 [7]. Cohort B refers to 50 infants enrolled to investigate the association between PDA and plasma CT-proET1 levels at DOL 2 and 6 [8]. Between-group comparisons were performed with Mann-Whitney U test. Note the similarities in the distribution of CT-proET1 values which enabled us to combine the measurements of the two cohorts.

DOL: day of life, BPD: bronchopulmonary dysplasia, PDA: patent ductus arteriosus
