# Supplementary material
Source: publisher figshare collection journal article supplement (https://karger.figshare.com/articles/dataset/_/5128585)
Supplement: Supplementary file 2 [file 1]

## **Supplementary Table**

Title: Plasma pro endothelin-1 as an early marker of bronchopulmonary dysplasia

Authors: Philipp Baumann, Sotirios Fouzas, Isabelle Pramana, Beate Grass, Oliver Niesse, Christoph Bühner, Katharina Spanaus, Sven Wellmann

*Journal:* Neonatology

### **Supplementary Table. Characteristics of the study cohorts**

|                                  | Cohort A<br>(n = 71) | Cohort B<br>(n = 50) | Cohort C<br>(n = 106) |
|----------------------------------|----------------------|----------------------|-----------------------|
| Male gender, %                   | 46.5                 | 52                   | 53.8                  |
| Gestational age, weeks           | 29.6 $\pm$ 1.8       | 28.9 $\pm$ 2.0       | 28.6 $\pm$ 2.1*       |
| Birth weight, g                  | 1310 $\pm$ 380       | 1290 $\pm$ 430       | 1100 $\pm$ 30†        |
| Cesarean section delivery, %     | 85.9                 | 84                   | 90.6                  |
| Antenatal corticosteroids, %     | 90.1                 | 88                   | 88.7                  |
| Respiratory distress syndrome, % | 50.7                 | 52                   | 65†                   |
| Patent ductus arteriosus, %      | 38                   | 44                   | 42.5                  |
| Days of mechanical ventilation   | 3.5 $\pm$ 9.8        | 2.9 $\pm$ 8.4        | 4.9 $\pm$ 12.4        |
| Days of CPAP                     | 10.6 $\pm$ 16.8      | 16 $\pm$ 17.1        | 27 $\pm$ 23†          |
| Days of oxygen requirement       | 15.4 $\pm$ 27        | 16 $\pm$ 28          | 28 $\pm$ 34†          |
| BPD (any severity), %            | 21.1                 | 42*                  | 44.3*                 |
| BPD (moderate/severe), %         | 11.3                 | 12                   | 12.3                  |

Data are presented as mean  $\pm$ SD unless stated otherwise.

\*Significantly different (P <0.05) compared to cohort A

†Significantly different (P <0.05) compared to cohort A and cohort B
